# Supplementary material
Source: Springer Nature journal article supplement (https://www.springermedizin.de/resource/supplementary/12943_2013_1246_MOESM5_ESM.pdf/9552716)

**A.****MCF-7**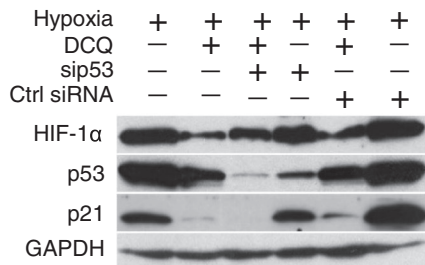**C.**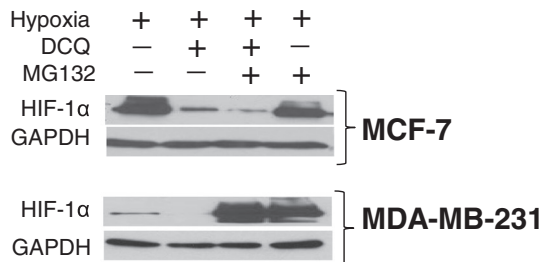**B.****MCF-7**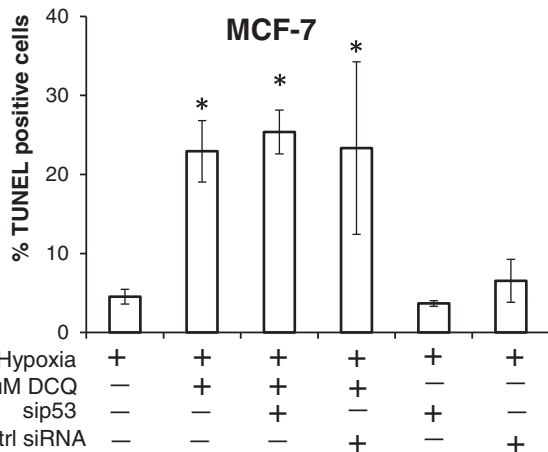**D.****MCF-7**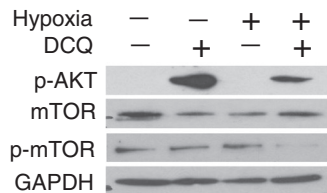

Supplement: MOESM5 [file 9552716]
